# Supplementary material
Source: MDPI journal article supplement (https://www.mdpi.com/2073-4395/12/1/191)
Supplement: s1 [file s1]

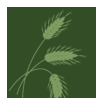

# Empower innovations in routine soil testing

Jan Adriaan Reijneveld, Martijn Jasper van Oostrum, Karst Michiel Brolsma, Dale Fletcher and Oene Oenema

In this supplementary information file, we present additional data and information related to:

- S1. NIRS Reference methods
  - S2. NIRS Calibration procedures
  - S3. NIRS Validation procedures
  - S4. Quality control of soil testing
  - S5. Scientific underpinning of the  $\text{CaCl}_2$  method
- References SI

**Figure S1.** Scatter plots of the results of NIRS determinations versus the results derived from conventional analyses procedures (right-hand figures) and scatter plots of the residual variance of these relationships (left-hand figures), for N-total, S-total, Ca-CEC, SOM, SOC, C-inorganic, Clay, CEC, pH, Sand, K-CEC, Mg-CEC: validation data set.

**Table S1.** Statistics of the calibration of NIRS to the results of the conventional methods. A distinction has been made between soil characteristics that have been implemented into laboratory practice for routine soil testing, and soil characteristics that are still in the phase of further testing (and thus have not yet been implemented into laboratory practice for routine soil testing); calibration data set.

### S1. NIRS Reference methods

NIRS analyses were calibrated to results of reference (conventional) analytical methods. N-total, and S-total were determined following Dumas's combustion with an elemental analyzer (dry combustion method) [125]. Effective CEC, K-CEC, Mg-CEC, Ca-CEC, Na-CEC, and Mn-CEC were determined by means of cobalt hexamine trichloride extractions followed by ICP-AES and AAS [126,127], and pH-CaCl<sub>2</sub> according ISO 10390 (2005) [128]. Soil organic matter (SOM) is determined by loss on ignition (550 °C) [129], soil organic carbon (SOC) as elemental C following dry combustion (550°C) [130–132], and total carbon (TC) which includes SOC and soil inorganic carbon (SIC) by dry combustion at 1150 °C [133]. Soil inorganic carbon (SIC) is determined by acidification [133]. Moisture content (to 40 °C) and dry matter content (from 40 – 103°C) of soil was done according NEN 5748, 1990 [134]. For NIRS calibration and validation measurement quality improvement (not as a reference) the loss of ignition procedure is also performed directly in the 40°C dried sample, so without oven drying from 40°C – 103°C. Plant available calcium and electric conductivity were determined with 1:2 water [135]. Clay content was determined through density fractionation [136,137]. Clay (< 2 µm) was also measured as part of the particle size analyses together with silt (2–16, and 16–50 µm) and several sand fractions (50 – 2000 µm) (pipet and sieve after removal of salts and organic matter by hydrogen peroxide) [137]. The median grain size of the sand fraction (M50) was calculated based on these sand fractions. Dissolved organic nitrogen (DON) was measured in 0.01 M CaCl<sub>2</sub> ([138]. Oxalate extractable Al, Fe, and P were determined [139,140] and used for P-binding and P-saturation (so both calculation based on oxalate extractable Al, Fe, and P). P-total was measured [141,142].

### S2. NIRS Calibration procedures

For relating the NIR-signals to reference results, calibration models were developed. The first soil models at Eurofins Wageningen were built in 2003, and in 2004 the first soil characteristics (N-total, and SOM) [86] were routinely offered to the soil testing market. The calibration has been continuously improved since then. Soil samples with a too large Mahalanobis distance (distance of an unknown sample to the middle of the local selected calibration samples) are considered outliers and subsequently analyzed by the reference methods (and these results are reported, and also added to the calibration data base). In addition, 18 soil samples are - ad randomly - selected weekly and analyzed by the reference methods (at least in duplicate). Part of these results are used to improve the calibration, and part is used for validation.

### S3. NIRS Validation procedures

A separate set of data has been created for validation of the NIRS models. The data are not used for calibrations. The validation database we describe here contains roughly between 1500 and 2000 reference samples, depending on the year of introduction of the soil characteristics.

### S4. Quality control of soil testing

To establish the quality and reproducibility of the different soil characteristics, the results of analytical procedures are subject to quality assessment and assurance. This quality control is subdivided in first-, second- and third-line control procedures. The first-line control is performance checking by the laboratory analysts, using standard soil samples with well-known results. When the results of the standard soil samples exceed twice the standard deviation (95.5% of the results are within  $\pm 2$  s.d.) a notice will be made. When the results exceed three times the standard deviation (99.7% of the results are within  $\pm 3$  s.d.) the following step are taken i) investigation into the cause of the variation, ii) results are not reported iii) all samples of this batch are re-analyzed after the problem has been solved and the results meet the requirements, and iv) all results are recorded in a logbook. The second-line control is a check within the laboratory but independent of the executors (so the results of these control samples are not known to the analyst). The third-line control is an independent external check, a ring test. Eurofins Agro participates in the ring tests of ILVO ([www.ilvo.vlaanderen.be](http://www.ilvo.vlaanderen.be)), VITO ([www.vito.be](http://www.vito.be)), and Wepal (<http://www.wepal.nl/website/products/ISE.htm>). Both second and third line controls are part of NEN-EN-ISO 17025, 2018 [143] for which the laboratory is accredited.

### S5. Scientific underpinning of the CaCl<sub>2</sub> method

The multi-nutrient extractant 0.01 M CaCl<sub>2</sub> method is used worldwide and embedded in many scientific testing programs and papers [144]. To illustrate the case further, the 0.01 M CaCl<sub>2</sub> extraction method has been used for testing Si fertilization of sugar cane in South Africa [145], for testing K fertilization of rice in Iran [146] and finger millet in India [147], for testing Mn fertilization in tea in Turkey [148], and for testing S fertilization of various field and forage crops

in USA [149]. These reports indicate that the 0.01 M  $\text{CaCl}_2$  extraction method is diagnostic for identifying fertilization needs of a wide range of soil, crop and nutrient element combinations.

The multi-nutrient extractant 0.01 M  $\text{CaCl}_2$  method [150,151] was also tested in The Netherlands in several field trials for maize (*Zea mays*) grassland (*Lolium perenne*), and arable crops and vegetable crops [152–154]. Further, a large number of archived soil samples from Germany (arable crops) was re-analysed at the Eurofins laboratory in Wageningen and related to results from field experiments in Germany [155]. Also, results from 250 fertilization experiments were related to the results of thousands of re-analysed soil samples from the archive of Wageningen University TAGA [156], and the resulting relationships were used for new crop, and soil based fertilization recommendation. Meanwhile further desk studies and field trials were performed and are still in process for K, and Mg [157–162]. Also validation studies were performed; soil N-tests (e.g. dissolved organic nitrogen extracted with  $\text{CaCl}_2$ ) and their role in N-fertilization recommendations were extensively investigated [163–165]. Relations between selenium (Se- $\text{CaCl}_2$ ), plant uptake and fertilization of both grassland and arable land were studied by Supriatin [166,167].

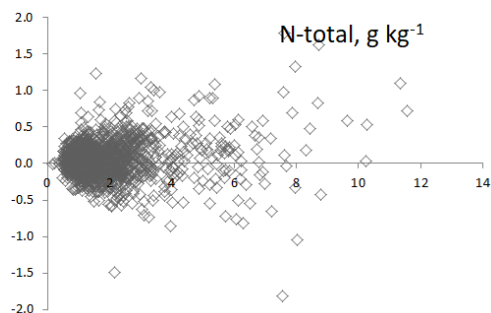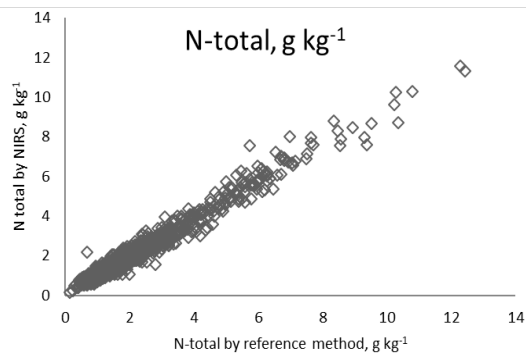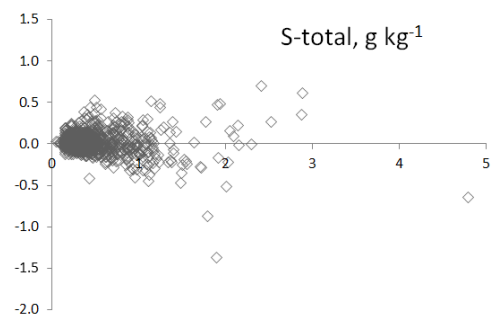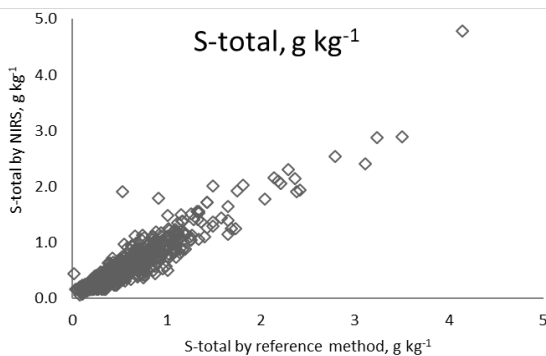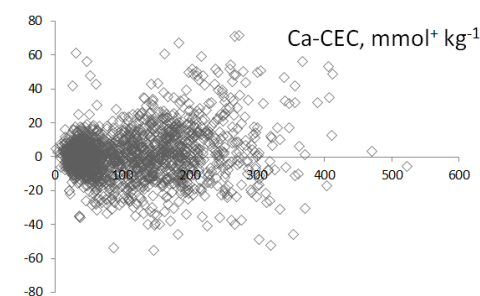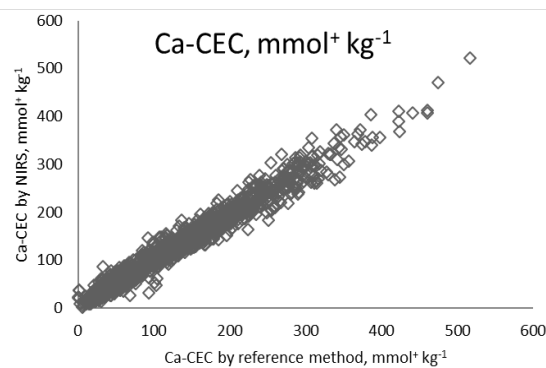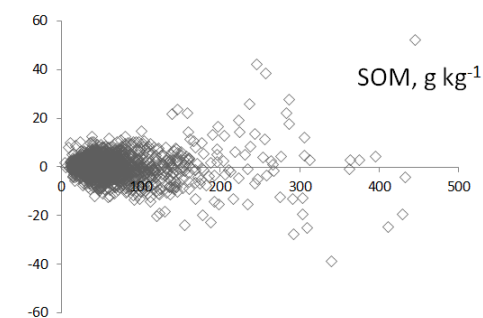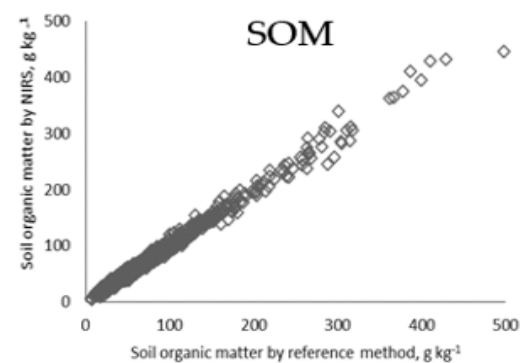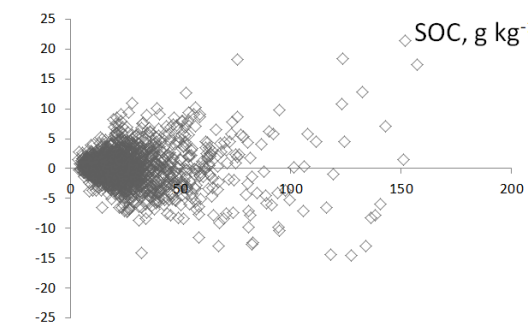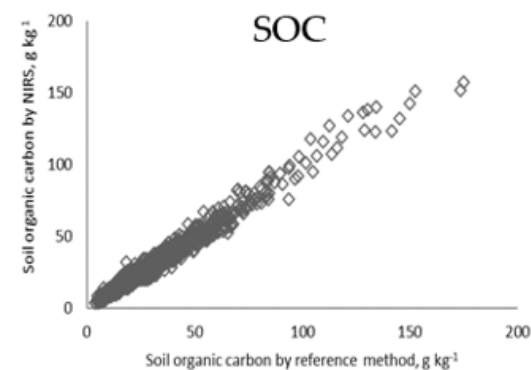

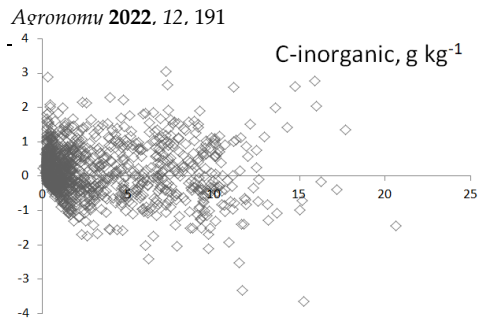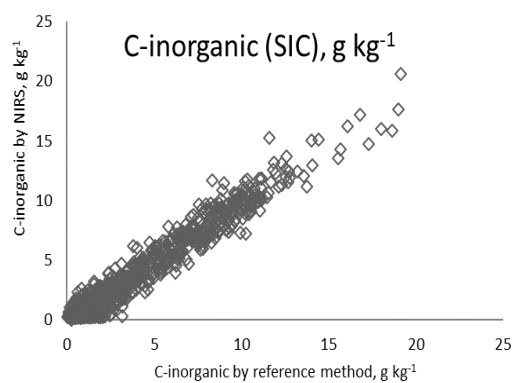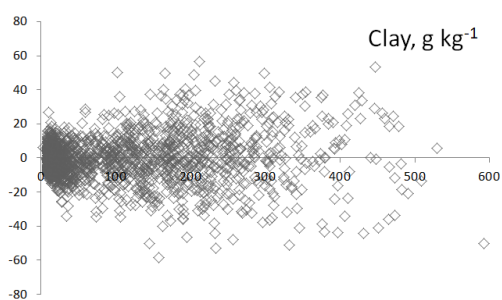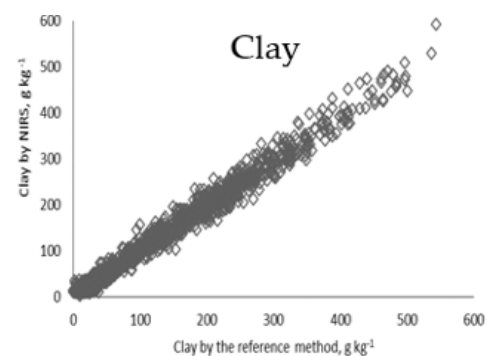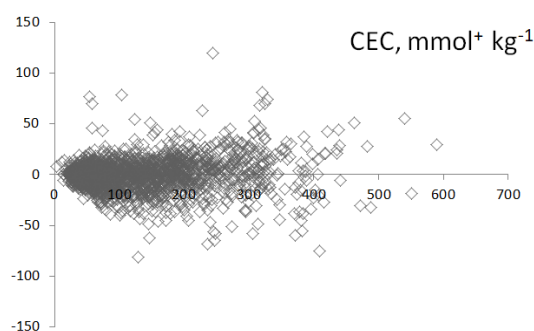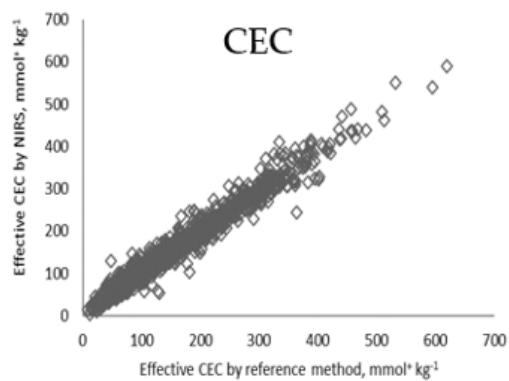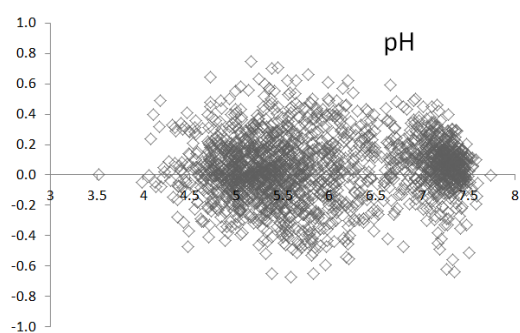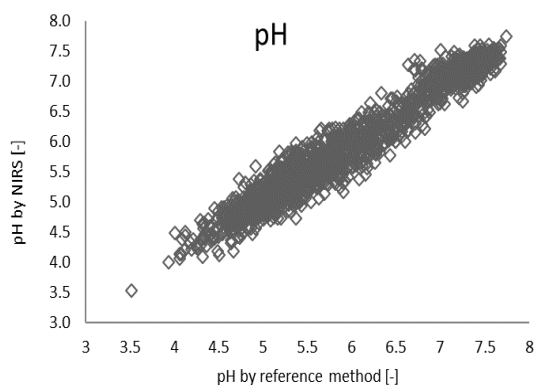

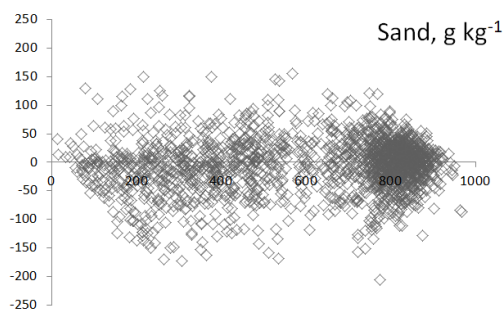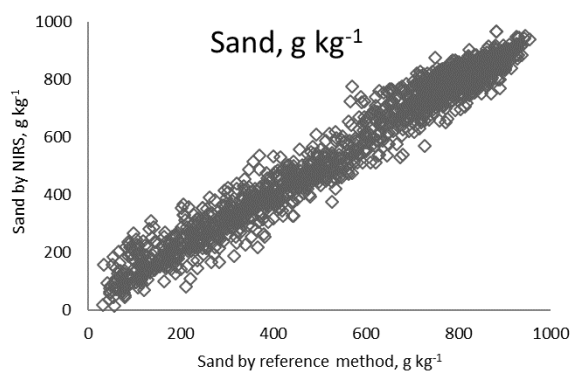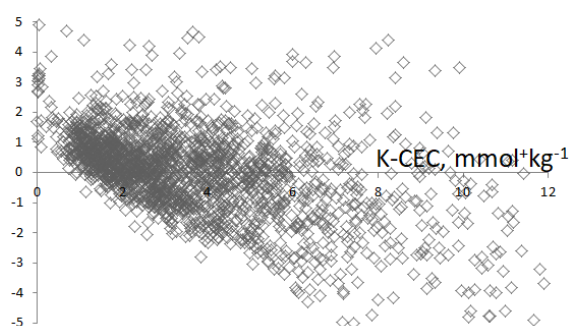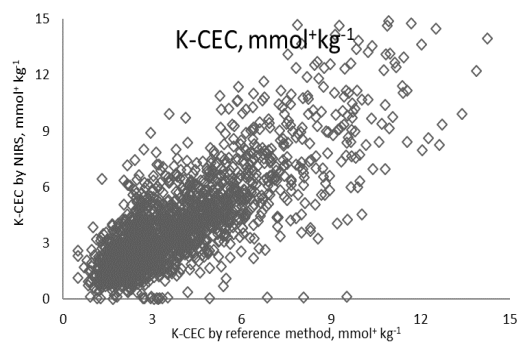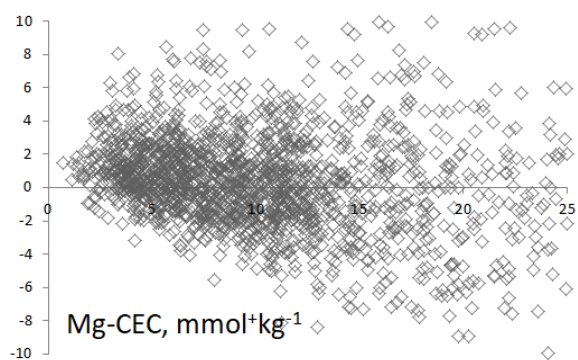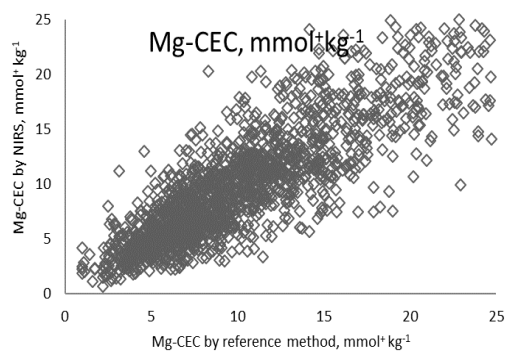

**Figure S1.** Scatter plots of the results of NIRS determinations versus the results derived from conventional analyses procedures (right-hand figures) and scatter plots of the residual variance of these relationships (left-hand figures), for N-total, S-total, Ca-CEC, SOM, SOC, C-inorganic, Clay, CEC, pH, Sand, K-CEC, Mg-CEC: validation data set.

**Table S1.** Statistics of the calibration of NIRS to the results of the conventional methods. A distinction has been made between soil characteristics that have been implemented into laboratory practice for routine soil testing, and soil characteristics that are still in the phase of further testing (and thus have not yet been implemented into laboratory practice for routine soil testing). PMN = potentially mineralizable nitrogen [168]: calibration data set.

| Soil characteristic<br><i>Implemented</i> | calibration |                |      |        |      |        |        |
|-------------------------------------------|-------------|----------------|------|--------|------|--------|--------|
|                                           | n           | r <sup>2</sup> | year | Bias   | RPD  | Sres   | RMSD   |
| N-total                                   | 55947       | 0.99           | 2004 | 0.002  | 8.6  | 0.53   | 0.53   |
| S-total                                   | 37783       | 0.97           | 2004 | -0.000 | 5.5  | 0.21   | 0.21   |
| K-CEC                                     | 16144       | 0.79           | 2006 | -0.040 | 2.0  | 2.19   | 2.19   |
| Ca-CEC                                    | 15742       | 0.97           | 2006 | 0.483  | 5.5  | 17.52  | 17.53  |
| Mg-CEC                                    | 15732       | 0.88           | 2006 | -0.015 | 2.7  | 6.32   | 6.32   |
| pH-CaCl <sub>2</sub>                      | 89075       | 0.97           | 2013 | -0.004 | 5.3  | 0.18   | 0.18   |
| SOC                                       | 21976       | 0.99           | 2004 | 0.066  | 12.9 | 4.93   | 4.93   |
| SOM                                       | 24825       | 1.00           | 2004 | 0.007  | 17.5 | 6.46   | 6.46   |
| SIC                                       | 15864       | 0.97           | 2004 | 0.001  | 5.6  | 1.45   | 1.45   |
| Clay                                      | 49121       | 0.98           | 2004 | 0.664  | 7.0  | 17.97  | 17.99  |
| Sand                                      | 8419        | 0.96           | 2015 | 1.390  | 4.7  | 58.37  | 58.39  |
| ECEC                                      | 16122       | 0.97           | 2005 | 0.125  | 5.8  | 20.44  | 20.44  |
| <i>In process/ not reported</i>           |             |                |      |        |      |        |        |
| DON-CaCl <sub>2</sub>                     | 4421        | 0.89           | -    | 0.788  | 2.8  | 28.26  | 28.27  |
| PMN                                       | 7897        | 0.88           | 2007 | 0.816  | 2.7  | 21.58  | 21.60  |
| P-total                                   | 4280        | 0.95           | -    | -0.119 | 4.2  | 26.63  | 26.63  |
| P-oxalate                                 | 7477        | 0.74           | -    | -0.067 | 1.7  | 5.80   | 5.81   |
| Al-oxalate                                | 7478        | 0.95           | -    | -0.109 | 4.1  | 12.66  | 12.66  |
| Fe-oxalate                                | 7498        | 0.91           | -    | 0.126  | 3.1  | 24.12  | 24.12  |
| P-binding                                 | 4853        | 0.93           | -    | 0.020  | 3.5  | 13.70  | 13.70  |
| P-saturation                              | 4853        | 0.68           | -    | 0.222  | 1.6  | 12.71  | 12.72  |
| P-Al (Brolsma et al., 2018)               | 113,072     | 0.83           | 2014 | 0.770  | 2.6  |        |        |
| Ca-water                                  | 2567        | 0.87           | 2015 | 0.019  | 2.6  | 0.93   | 0.93   |
| Na-CEC                                    | 10238       | 0.77           | 2006 | -0.008 | 1.8  | 0.71   | 0.71   |
| Mn-CEC                                    | 7243        | 0.69           | -    | 0.011  | 1.5  | 0.32   | 0.32   |
| EC                                        | 3433        | 0.77           | -    | 0.011  | 1.8  | 0.37   | 0.37   |
| TC                                        | 5870        | 1.00           | -    | 0.038  | 14.3 | 4.21   | 4.21   |
| Dry matter (40 - 105°C)                   | 23374       | 0.99           | -    | 0.022  | 8.5  | 2.33   | 2.33   |
| 2-16 µm texture                           | 2401        | 0.96           | -    | 0.181  | 4.7  | 3.27   | 3.28   |
| Median sand (50 - 2000 µm)                | 2518        | 0.83           | 2017 | -1.242 | 2.2  | 26.67  | 26.70  |
| PLFA total                                | 1093        | 0.88           | 2019 | 5.808  | 2.7  | 299.39 | 299.45 |
| PLFA fungi                                | 1077        | 0.84           | 2019 | 1.420  | 2.3  | 106.84 | 106.85 |
| PLFA bacteria                             | 1086        | 0.91           | 2019 | 3.837  | 3.0  | 108.68 | 108.74 |

## References SI

- 
125. ISO-13878. 1998. Soil quality — Determination of total nitrogen content by dry combustion ("elemental analysis"). [www.iso.org](http://www.iso.org)
126. ISO-23470. 2018. Soil quality — Determination of effective cation exchange capacity (CEC) and exchangeable cations using a hexamine cobalt(III)chloride solution. [www.iso.org](http://www.iso.org)
127. NEN 6966 2005. Environment - Analyses of selected elements in water, eluates and destruates - Atomic emission spectrometry with inductively coupled plasma [www.nen.nl](http://www.nen.nl)
128. ISO 10390. 2005 Soil quality — Determination of pH. [www.iso.org](http://www.iso.org)
129. NEN 5754. 2014. Soil - Calculation of organic matter content on a mass basis as loss-on-ignition. [www.nen.nl](http://www.nen.nl) (In Dutch). [www.nen.nl](http://www.nen.nl)
130. Yeomans, J.C.; Bremner, J.M. Carbon and nitrogen analysis of soils by automated combustion techniques. *Communications in Soil Science and Plant Analysis*, **1991**, Volume 22, pp. 843 - 850.
131. Soon, Y.K.; Abboud, S. A comparison of some methods for soil organic carbon determination. *Communications in Soil Science and Plant Analysis*, **1991**, Volume 2, pp. 943 - 954.
132. ISO-10694. 1995. Soil quality — Determination of organic and total carbon after dry combustion (elementary analysis). [www.iso.org](http://www.iso.org).
133. NEN-EN 15936. 2012. Sludge, treated biowaste, soil and waste - Determination of total organic carbon (TOC) by dry combustion. [www.nen.nl](http://www.nen.nl)
134. NEN 5748, 1990. Soil - Determination of moisture content and dry matter content of air-dry soil [www.nen.nl](http://www.nen.nl)
135. Sonneveld, C.; van den Ende, J. Soil analysis by means of a 1:2 volume extract. *Plant and Soil*, **1971**, Volume 35, pp. 505-516.
136. Hooghoudt, S.B. Contribution to the knowledge of some soil physical properties / A combined sieve and pipette method for the determination of the soil granular composition. Verslagen van Landbouwkundige Onderzoekingen 50 (13)A; 's-Gravenhage, The Netherlands, 1945. (In Dutch).
137. NEN 5753. 2018. Soil - Determination of clay content and particle size distribution in soil and sediment by sieve and pipet. [www.nen.nl](http://www.nen.nl) (In Dutch) [www.nen.nl](http://www.nen.nl)
138. Houba, V.J.G.; van Erp, P.J.; Fotyma, M.; Loch, J.; Baier, J. Development and testing of a universal soil extraction method for the evaluation of soil fertility and soil pollution. *Communications in Soil Science and Plant Analysis*, **1996**, Volume 27, pp. 233.
139. NEN 5776 2006. Soil - Determination of iron, aluminium and phosphorus in an ammonium oxalate-oxalic acid extract for estimation of the saturation with phosphate [www.nen.nl](http://www.nen.nl)
140. Schwertmann, U. Differentiation of the iron oxides of the soil by extraction with an ammonium oxalate solution *Z. Pflanzenernährung. Düng. Bodenk.*, **1964**, Volume 105, pp. 194-202. (In German).



141. NEN 5768 1992. Soil - Sample preparation of soil for the determination of elements by atomic spectrometry - Destruction with nitric acid and sulfuric acid [www.nen.nl](http://www.nen.nl)
142. NEN-EN-ISO 15923-1, 2013, Water quality - Determination of selected parameters by discrete analysis systems - Part 1: Ammonium, nitrate, nitrite, chloride, orthophosphate, sulfate and silicate with photometric detection. [www.nen.nl](http://www.nen.nl).
143. NEN-EN-ISO 17025, 2018 General requirements for the competence of testing and calibration laboratories. [www.nen.nl](http://www.nen.nl)
144. Hylander, L.; Svensson, H.-I.; Simán, G. Extraction of soil phosphorus with calcium chloride solution for prediction of plant availability. *Communications in Soil Science and Plant Analysis*, **1995**, Volume 26, pp. 1151 – 1168.
145. Miles, N.; Manson, A.D.; Rhodes, R.; van Antwerpen, R.; Weigel, N. Extractable silicon in soils of South African sugar industry and relationships with crop uptake. *Communications in Soil Science and Plant Analysis*, **2014**, Volume 45, pp. 2949 – 2958.
146. Kavoosi, M.; Kalbasi, M.; Aliakbar, A. Comparison of capsule resin data and kinetic parameters with some static soil tests to predict potassium uptake by rice. *Communications in Soil Science and Plant Analysis*, **2003**, Volume 34, pp. 2073 – 2083.
147. Srinivasarao, Ch.; Sumanta Kundu, B. K.; Ramachandrappa, Sharanbhoopal. Potassium release characteristics, potassium balance, and finger millet (*Eleusine coracana* G.) yield sustainability in a 27- year long experiment on an Alfisol in the semi-arid tropical India. *Plant Soil*, **2014**, Volume 374, pp.315 – 330.
148. Sürücü, A.; Özyazici, M. A.; Özyazici, G.; Uygur, V. Determination of Appropriate Extraction Methods for Available Iron, Copper, Zinc and Manganese in Acid Soils. *Journal of Agricultural Sciences*, **2013**, Volume 19, pp. 256 – 267.
149. Spargo, J.T.; Beegle, D.B.; Ketterings, Q.M. Sulphur fertility evaluation of field and forage crops in the Northeastern USA. Abstract and oral presentation for the 15th International Symposium on Soil and Plant Analysis (ISSPA) Symposium, Nanjing, China, May 2017.
150. NEN EN 16179. 2012. Sludge, treated biowaste and soil - Guidance for sample pretreatment. [www.nen.nl](http://www.nen.nl)
151. NEN 5704. 1996. Soil – Sample preparation of soil. Extraction with calcium chloride solution (0.01 mol/l). [www.nen.nl](http://www.nen.nl). (In Dutch). [www.nen.nl](http://www.nen.nl)
152. Bussink, D.W.; Reijneveld, J.A.; van Rotterdam – Los, A.M.D. A new concept for phosphorus fertiliser recommendations. **2007**, 119 VDLUFA. (Ein neuer Ansatz für die P-Düngungsempfehlung; In German).
153. Bussink, D.W.; van Schöll, L.; van den Draai, H.; Bakker, R.F. Testing the new P-recommendation system: less P-fertilizer can be used. *NMI report*, **2008**, Volume 1160. (In Dutch).
154. Bussink, D.W.; van Schöll, L.; van den Draai, H.; Bakker, R.F. Testing the new P-recommendation system: less P-fertilizer can be used. *NMI report*, **2009**, Volume 1151. (In Dutch).

155. Bussink, D.W.; Reijneveld, J.A. Re-analysis of a soil data set from Germany as foundation for a new fertilization recommendation for arable crops. *NMI report 1316*, **2010**, Volume 9. (In Dutch).
156. Ehlert, P.A.I.; Reijneveld, J.A.; Brolsma, K.; Oenema, O. Phosphorus fertilization recommendations for potato based on a combined soil phosphorus indicator. In preparation.
157. Ehlert, P.A.I.; Burgers, S.L.G.E.; Steenhuizen, J.W.; van Lune, P.; Loman, H. The possibilities of 0.01 M calciumchloride analysis for the potassium fertilization recommendations for arable land. Recalibration of the recommendations for arable land. *Dienst Landbouwkundig Onderzoek, Instituut voor Agrobiologisch en Bodemvruchtbaarheidsonderzoek (AB-DLO)*, **1998**, Rapport 87. Haren, Nederland. (In Dutch). <https://edepot.wur.nl/417125>
158. Ros, G.H.; Bussink, D.W. Towards a new K-recommendation for arable land. *Internal NMI*, **2011**, report 1436.N.11. (In Dutch).
159. Bussink, D.W.; van Rotterdam – Los A.M.D. Fertilization recommendation for Mg based on intensity, buffering capacity and quantity: a quick scan. *NMI report*, **2018**, Volume 1477.N.12. (In Dutch).
160. Oltmer, K.; Reijneveld, J.A.; Brolsma, K.; Oerlemans, K. Optimising K-application based on soil intensity and soil quantity. *VDLUFA-Schriftenreihe*, **2015**, Volume 71, pp. 104 – 111. (Optimierung der Kaliumdüngung auf Basis von Vorrat und Verfügbarkeit: In German).
161. Bussink, D.W.; van Schooten, H.; van Middelkoop, J.; Holshof, G.; Doppenberg, G. Towards a new K fertilizer recommendation for silage maize in the Netherlands. **2018**, 130-VDLUFA.
162. Brolsma, K.M.; Rongen, J.G.L.M.; Reijneveld, J.A. Potassium in soil fertility, nutrient uptake and product quality, a case study in onions and potatoes. Abstract and oral presentation for the 16th International Symposium on Soil and Plant Analysis (ISSPA) Symposium; Wageningen, The Netherlands, 2019.
163. Bregliani, M. M.; Temminghoff, E.J.M.; van Riemsdijk, W.H.; Haggi, E.S. *Communications in Soil Science and Plant Analysis*, **2006**, Volume 37, pp.1571 – 1586.
164. Ros, G.H.; Hoffland, E.; van Kessel, Chr.; Temminghoff, E.J.M. Extractable and dissolved soil organic nitrogen – A quantitative assessment. *Soil Biology & Biochemistry*, **2009**, Volume 41, pp. 1029 – 1039.
165. Ros, G.H.; Reijneveld, J.A. Agronomic relevance of extractable organic nitrogen. In preparation.
166. Supriatin, S.; Weng, L.; Comans, R.N.J. Selenium-rich dissolved organic matter determines selenium uptake in wheat grown on low-selenium arable land soils. *Plant Soil*, **2016**, DOI 10.1007/s11104-016-2900-7
167. Supriatin, S. Selenium speciation and bioavailability in Dutch agricultural soils: The role of soil organic matter. PhD Thesis, Wageningen University, The Netherlands, 2016.

168. Waring, S.A.; J.M. Bremner, J.M. Ammonium production in soil under waterlogged conditions as an index of nitrogen availability. *Nature*, **1964**, *201*, 951 – 952.
